# Supplementary material for: Nanostructured plasmonic chips employing nanopillar and nanoring hole arrays for enhanced sensitivity of SPR-based biosensing
Source: Royal Society of Chemistry journal article supplement (doi:10.1039/d1ra07937a), 2022-01-01
Supplement: d1ra07937a1.pdf [file d1ra07937a1.pdf]

## Supporting information

### Nanostructured Plasmonic Chips Employing Nanopillar and Nanoring Hole Arrays for Enhanced Sensitivity of SPR-based Biosensing

Ajay Kumar Agrawal,<sup>†a</sup> Aakansha Suchitta,<sup>†a</sup> and Anuj Dhawan<sup>\*a</sup>

<sup>a</sup>Department of Electrical Engineering, Indian Institute of Technology Delhi, Hauz Khas, New Delhi 110016, India. E-mail: adhawan@ee.iitd.ac.in

<sup>†</sup>Both authors contributed equally to this work

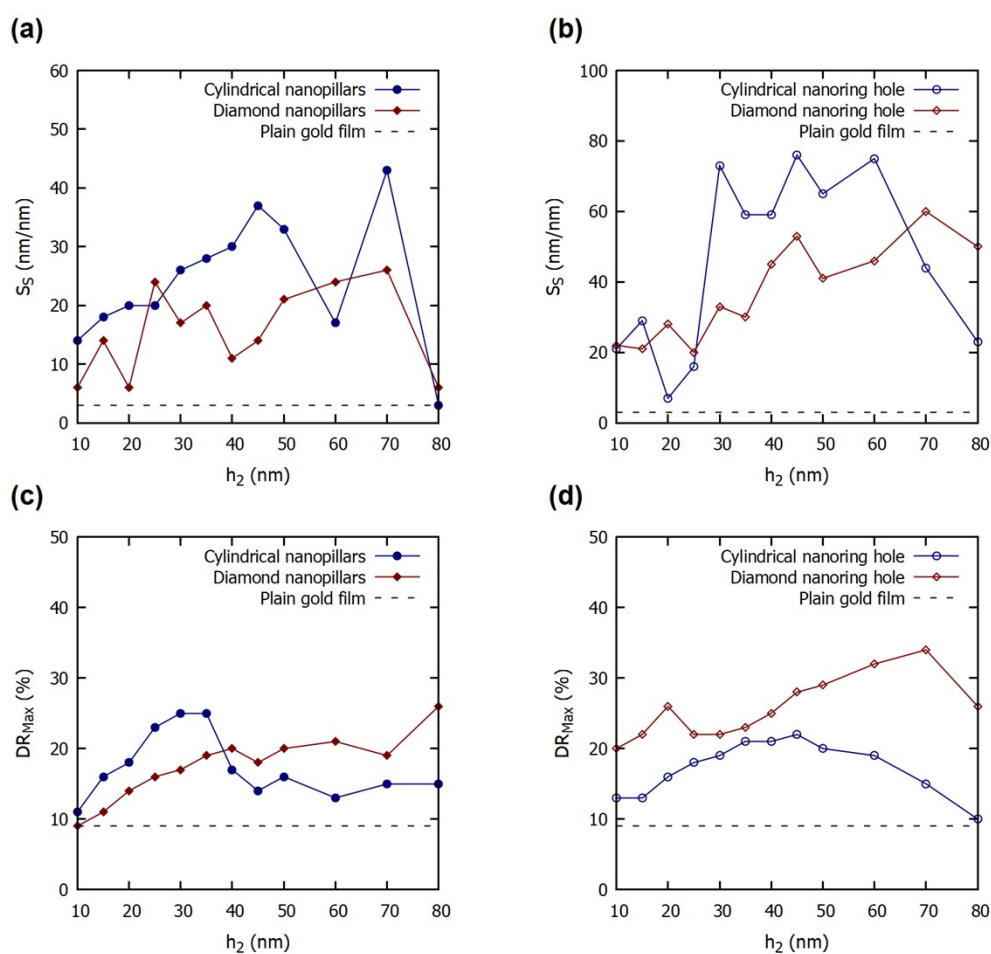

Fig. S1. Effect of variation in parameter, ' $h_2$ ' on the values of the surface sensitivity ( $S_S$ ) and maximum differential reflectance ( $DR_{Max}$ ) for different configurations of the nanostructures present on top of a thin gold film: (a) & (c) a cylindrical nanopillar array and a diamond nanopillar array and (b) & (d) a cylindrical nanoring hole array and a diamond nanoring hole array. For

comparison, the maximum differential reflectance for an optimized plain gold film is also shown in the figures with a dashed line. The values of  $d$  and  $g$  are taken as 50 nm and 5 nm, respectively.

Table S1  $FOM_S$  (in  $\text{nm}^{-1}$ ) values for four nanostructured thin films with the variation in parameter 'g'. The values of both  $h_2$  and  $d$  are taken as 40 nm.

| g (nm) | Cylindrical Nanopillars | Diamond nanopillar | Cylindrical Nanoring hole | Diamond Nanoring hole |
|--------|-------------------------|--------------------|---------------------------|-----------------------|
| 5      | 0.20                    | 0.06               | 0.15                      | 0.41                  |
| 6      | 0.24                    | 0.21               | 0.26                      | 0.19                  |
| 8      | 0.15                    | 0.12               | 0.16                      | 0.18                  |
| 10     | 0.14                    | 0.13               | 0.10                      | 0.15                  |
| 15     | 0.14                    | 0.11               | 0.15                      | 0.09                  |
| 20     | 0.05                    | 0.05               | 0.07                      | 0.10                  |

Table S2  $FOM_S$  (in  $\text{nm}^{-1}$ ) values for four nanostructured thin films with the variation in parameter ' $h_2$ '. The values of  $d$  and  $g$  are taken as 50 nm and 5 nm, respectively.

| $h_2$ (nm) | Cylindrical Nanopillars | Diamond nanopillar | Cylindrical Nanoring hole | Diamond Nanoring hole |
|------------|-------------------------|--------------------|---------------------------|-----------------------|
| 10         | 0.31                    | 0.11               | 0.36                      | 0.31                  |
| 15         | 0.24                    | 0.19               | 0.34                      | 0.21                  |
| 20         | 0.23                    | 0.06               | 0.05                      | 0.28                  |
| 25         | 0.21                    | 0.21               | 0.07                      | 0.21                  |
| 30         | 0.28                    | 0.16               | 0.12                      | 0.25                  |
| 35         | 0.22                    | 0.18               | 0.24                      | 0.23                  |
| 40         | 0.20                    | 0.09               | 0.25                      | 0.32                  |
| 45         | 0.21                    | 0.13               | 0.31                      | 0.36                  |
| 50         | 0.16                    | 0.15               | 0.26                      | 0.27                  |
| 60         | 0.07                    | 0.17               | 0.26                      | 0.25                  |
| 70         | 0.18                    | 0.16               | 0.13                      | 0.33                  |
| 80         | 0.01                    | 0.04               | 0.07                      | 0.29                  |
